# Supplementary material for: RETRACTED ARTICLE: Tumour microenvironment programming by an RNA–RNA-binding protein complex creates a druggable vulnerability in IDH-wild-type glioblastoma
Source: Springer Nature journal article supplement (doi:10.1038/s41556-024-01428-5), 2024-06-01

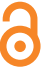

---

# **Tumour microenvironment programming by an RNA–RNA-binding protein complex creates a druggable vulnerability in IDH-wild-type glioblastoma**

---

In the format provided by the authors and unedited

## Supplementary Figure Legends

### Supplementary Figure 1: Generation of candidate hits.

**A)** Mutation landscape of hotspot mutation in 286 glioma patients based on whole exome sequencing data from CGGA (<http://www.cgga.org.cn/>).

**B)** Volcano blot showing differential expressed genes (left panel for all genes) and lncRNAs(right panel for between IDH-wildtype group and IDH-mutant group (Cut-off criteria:  $p\text{-value} < 0.05$  and  $|\log_2FC| \geq 2$ ). The differentially expressed genes are in red (up-regulated) and in green (down-regulated), while the insignificantly changed genes are in grey. LOC105375914 was highlighted with a grey dot.

### Supplementary Figure 2: Characterization of other RNAs in GBM.

**A-E)** qPCR analysis of **A)** *TERC*, **B)** *HOTAIR*, **C)** *MALAT1*, and **D)** *IGFBP2* expression in LN18 IDH-wildtype and IDH-mutant clones. p-values were calculated by two-tailed student's t-test method.

### Supplementary Figure 3: Characterization of GBM patients using multi-omics.

**A)** Mutational profile of hotspot mutation in eight glioblastoma patient samples.

**B)** LOC expression level (FPKM) in 6 glioblastoma patients separated by group of low and high LOC expression.

C) The CNV content of individual cells by using InferCNV. GAMs acted as reference cells. Copy numbers of chromosome 7 and chromosome 10 were highlighted by red boxes.

**Supplementary Figure 4: Model based on our study.**

In this study, we described a novel mechanism by targeting RNA:RBP dependent GAM infiltration to impair tumor growth and improve survival in glioblastoma, IDH-wildtype. Mechanistically, in glioblastoma, IDH-wildtype, folded LOC can be unwinded by RNA helicase DHX15, unfolded LOC complexes with DHX15 (“active” LOC:DHX15 RNP) sequesters phosphatase Wip1 to activate NF $\kappa$ B (p65) and p38 dependent transcription factors (TFs), a rate limiting step where temporal and simultaneous activation of multiple transcription factors is required to achieve appropriate concentration of NF $\kappa$ B subunits to co-occupy the promoters of target gene which facilitates proper chromatin remodelling for precise spatiotemporal expression of targets like MIF1. p65 accumulation together with other TFs on the promoter region of MIF1 leads to augmented MIF1 expression and subsequent higher infiltration of GAMs in the TME via MIF1-CD74 axis. Subsequent activation of MIF1-CD74 axis also triggers GAMs derived TNF $\alpha$  production, which in turns boost LOC expression. In addition, some other tumor-promoting genes (TPGs) which drives oncogenesis and therapy resistance will be also activated by p65 and p38 dependent TFs to accelerate tumor formation and confer therapeutic resistance. Targeting LOC:DHX15 using small molecule inhibitor diminishes tumor growth and prolong survival by perturbing these dual forward feedback loops: 1) a cell autonomous feedback loop driven by “active” LOC:DHX15 RNP-NF $\kappa$ B and p38 signalling; 2) non-cell autonomous feedback loop (highlighted by red dashed box) maintained by a crosstalk between cancer cells and GAMs via MIF1:CD74-TNF $\alpha$ .

A

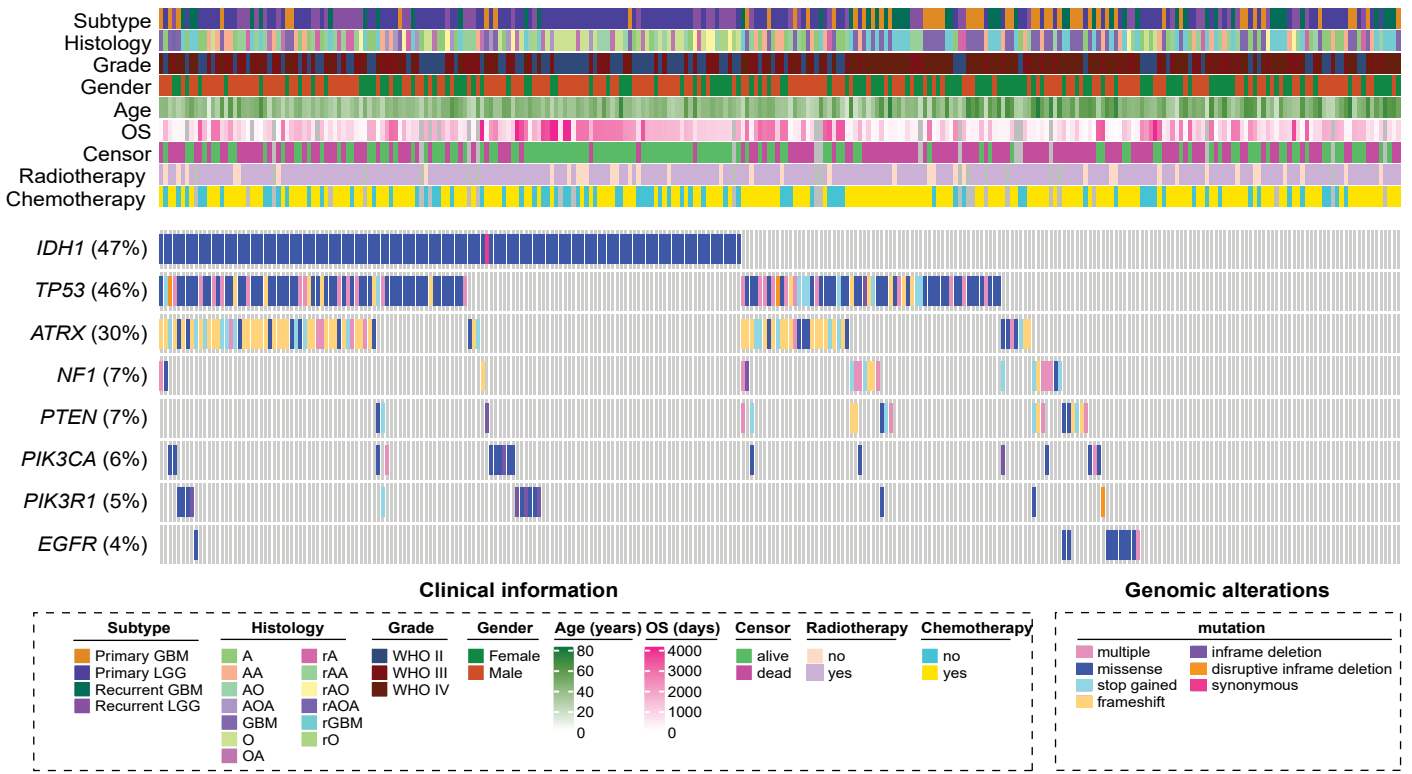

B

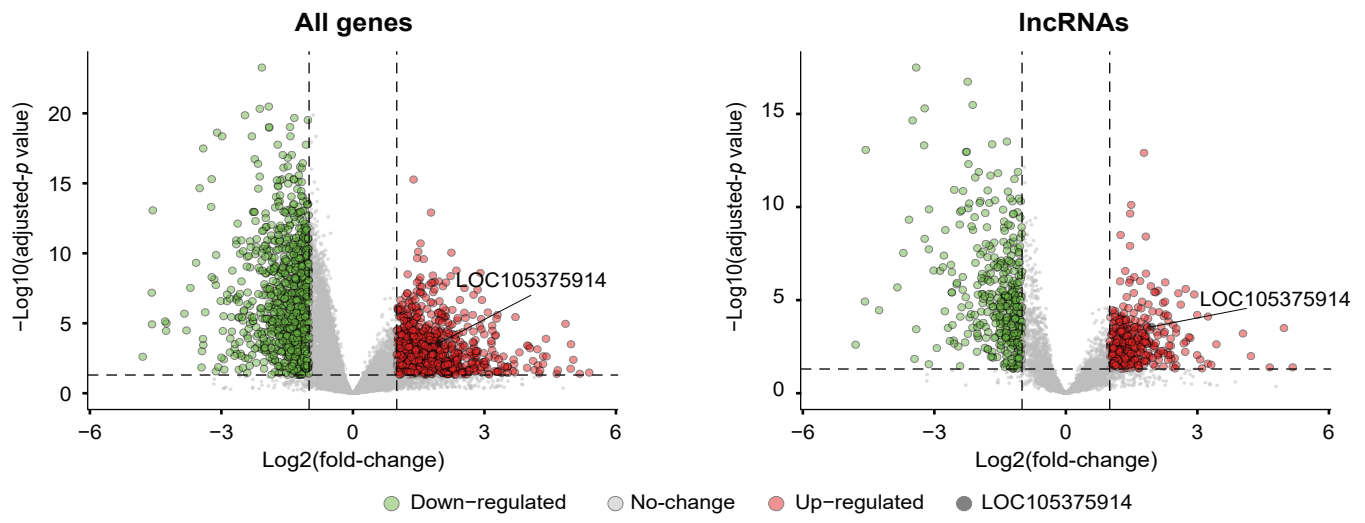

A

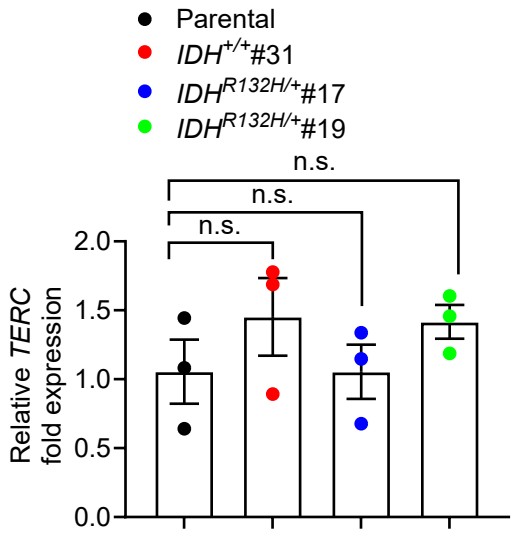

B

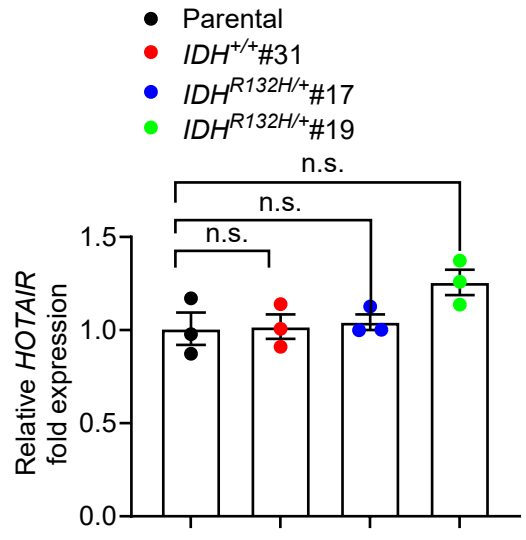

C

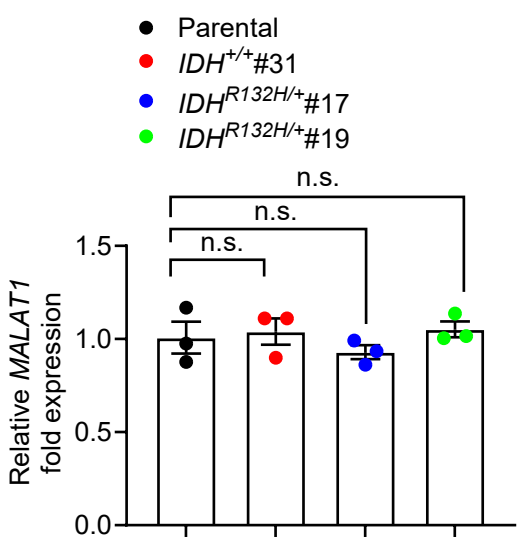

D

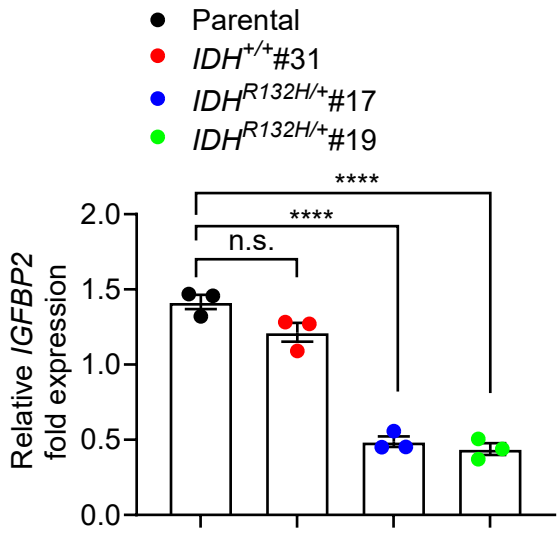

A

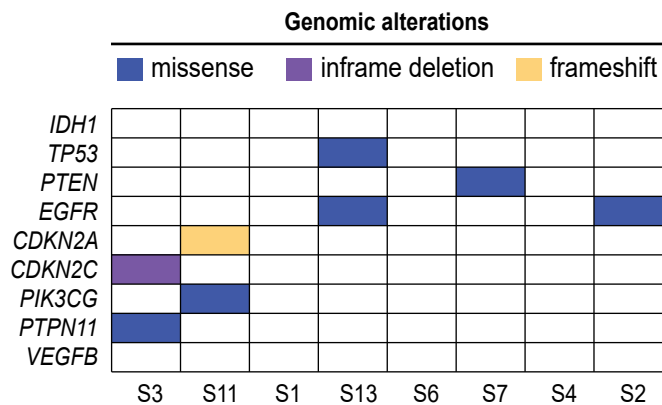

B

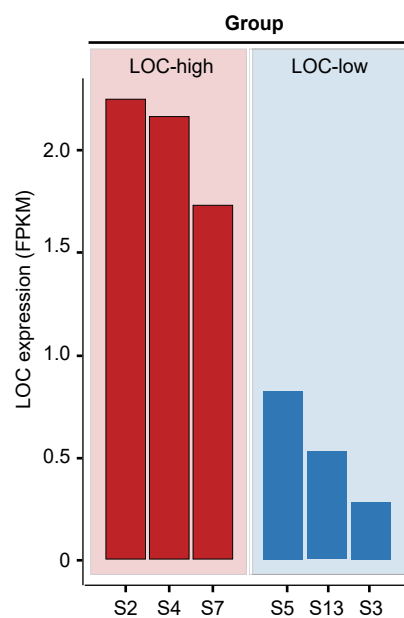

C

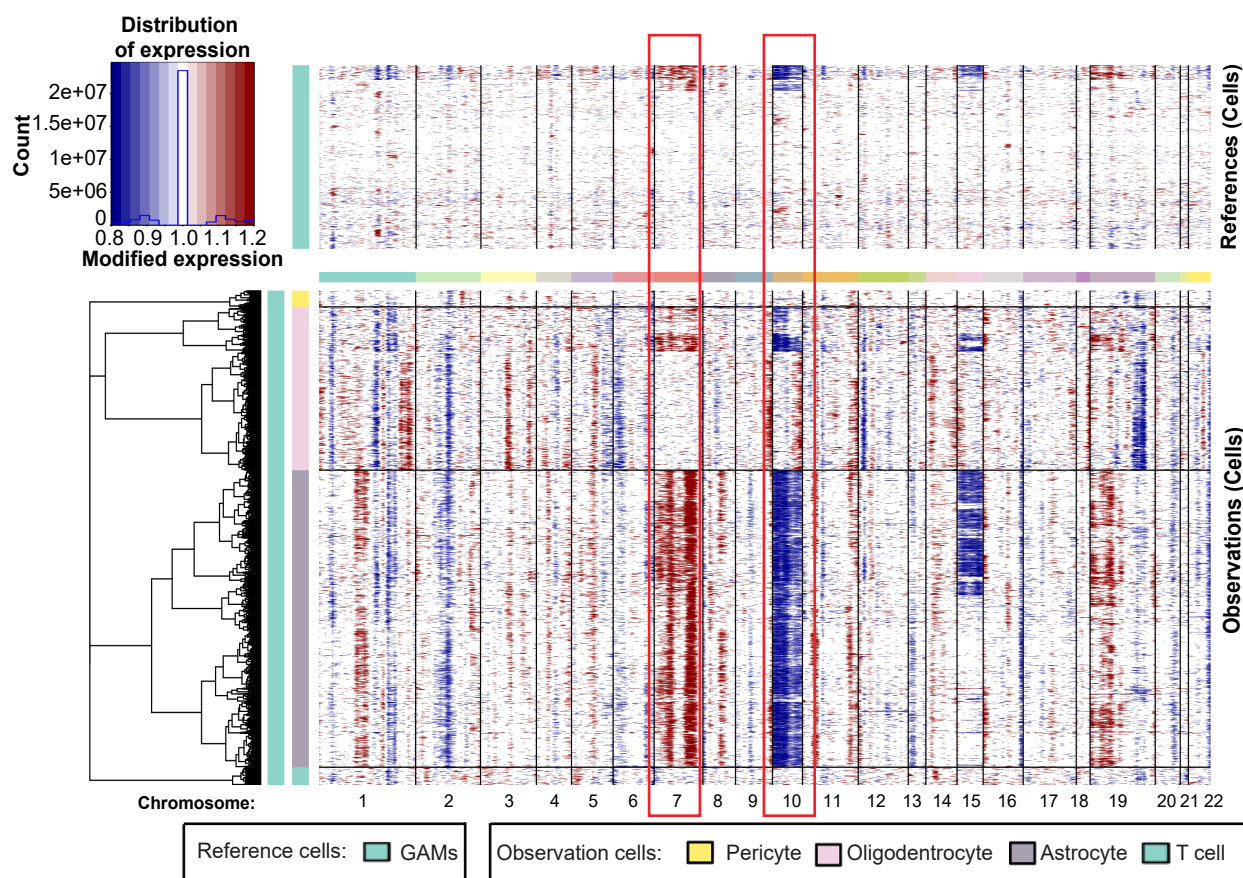

More GAM infiltration

Less GAM infiltration

LOC:DHX15 inhibitor

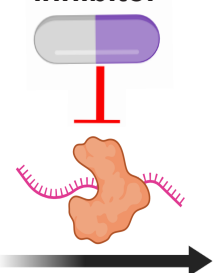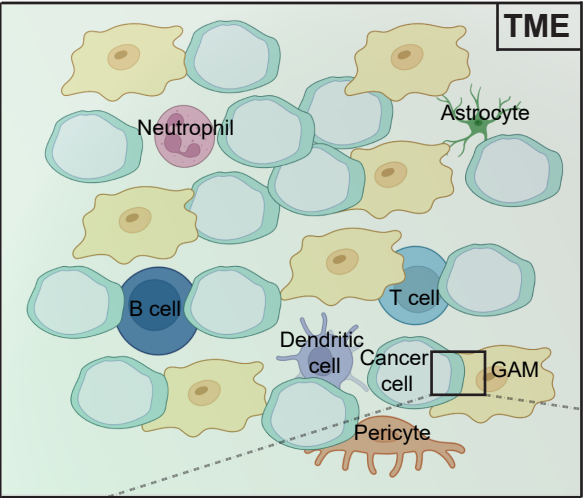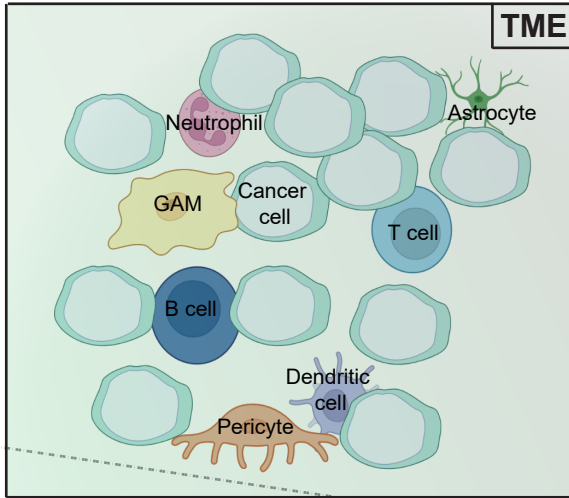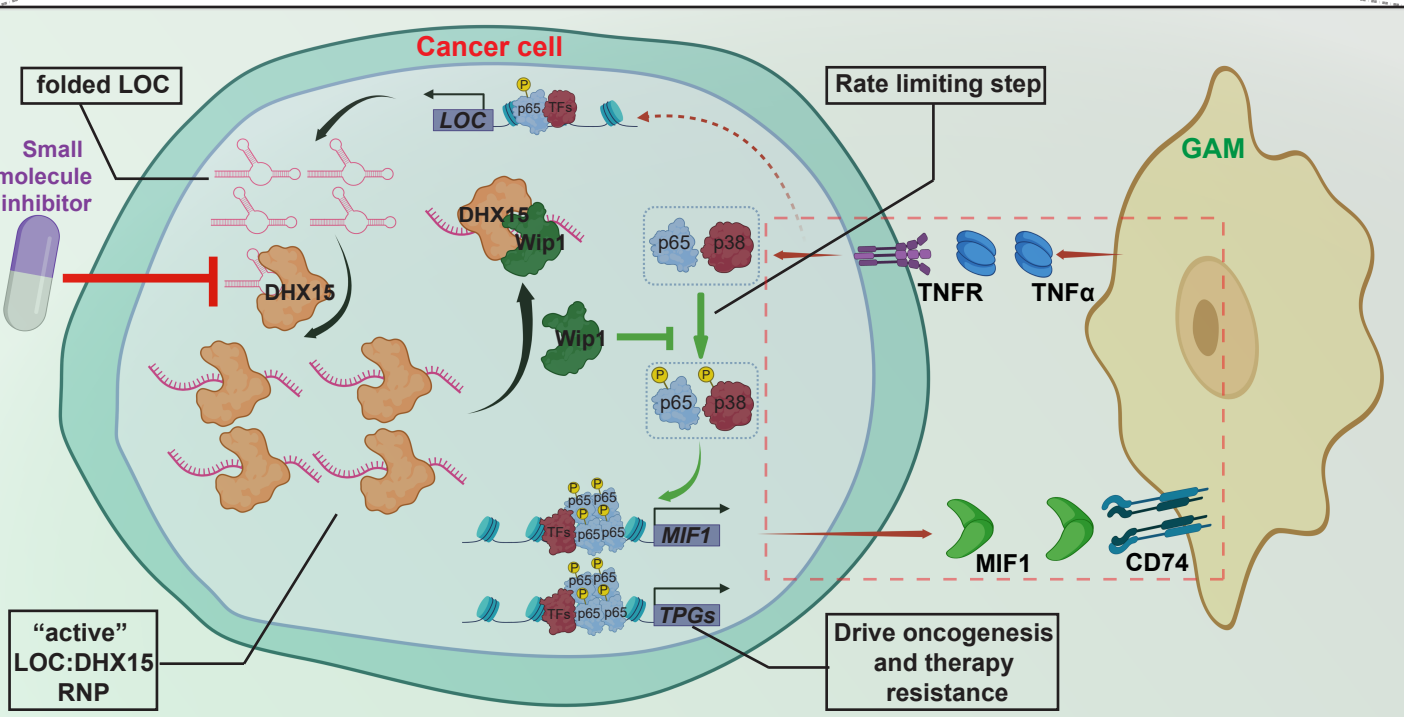

Supplement: 41556_2024_1428_MOESM1_ESM.pdf [file 41556_2024_1428_MOESM1_ESM.pdf]
