# Supplementary material for: RETRACTED ARTICLE: Tumour microenvironment programming by an RNA–RNA-binding protein complex creates a druggable vulnerability in IDH-wild-type glioblastoma
Source: Springer Nature journal article supplement (doi:10.1038/s41556-024-01428-5), 2024-06-01

IP: p65  
IB:DHX15

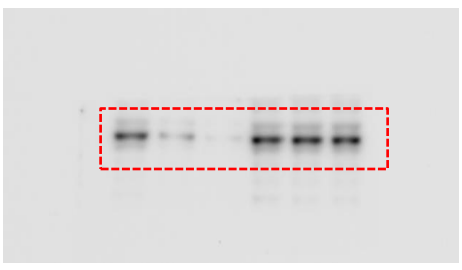

INPUT  
IB:DHX15

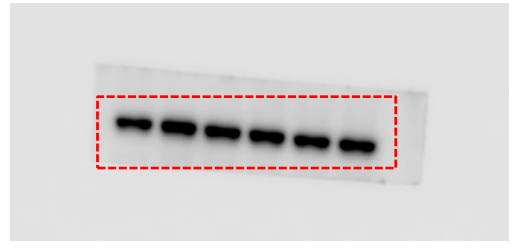

IP: p65  
IB: p65

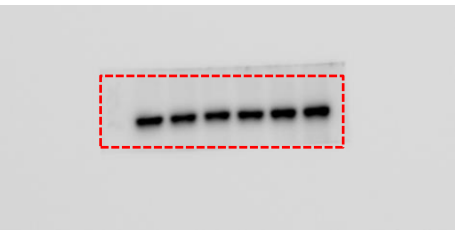

INPUT  
IB:Wip1

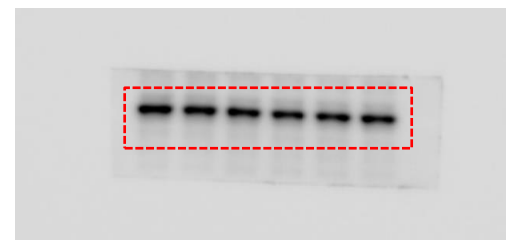

IP DHX15  
IB:Wip1

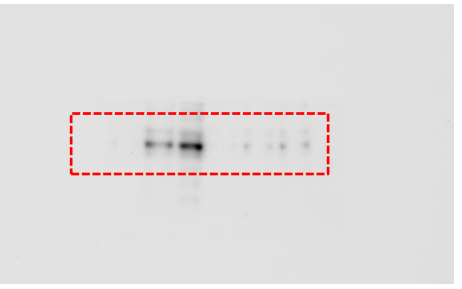

INPUT  
IB:p-p65

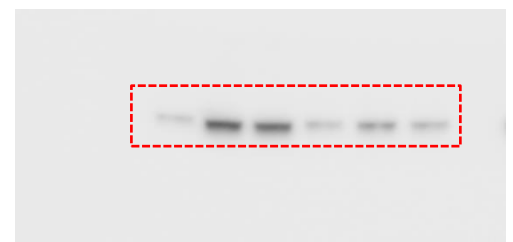

IP DHX15  
IB:DHX15

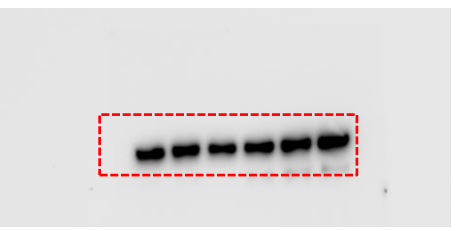

INPUT  
IB:p65

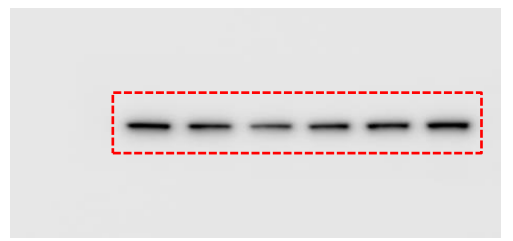

INPUT  
IB:p-p38

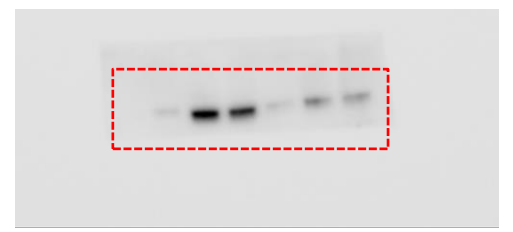

INPUT  
IB:p38

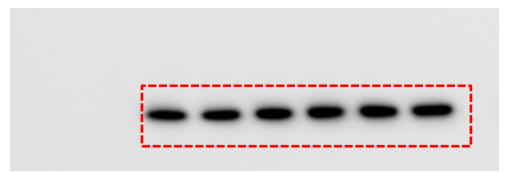

INPUT  
IB:Actin

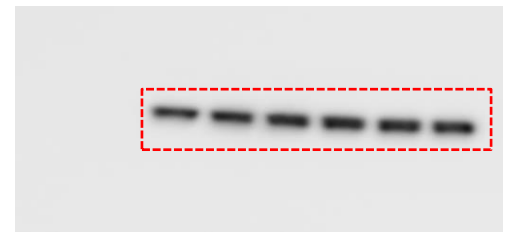

IP: Flag  
IB: Wip1

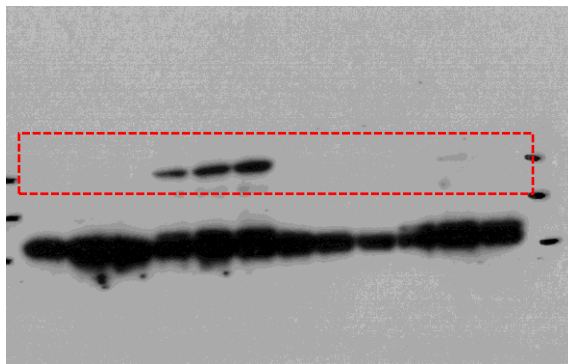

IP: Flag  
IB: Flag

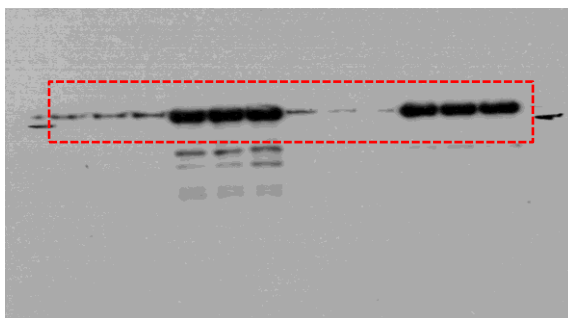

INPUT  
IB: Flag

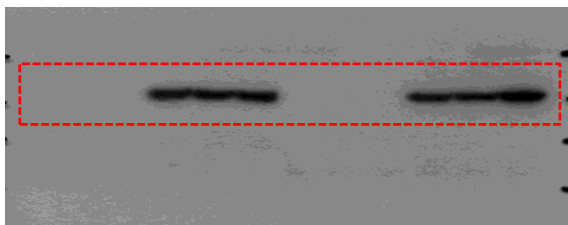

INPUT  
IB: Wip1

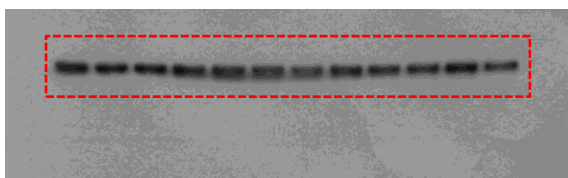

INPUT  
IB: Actin

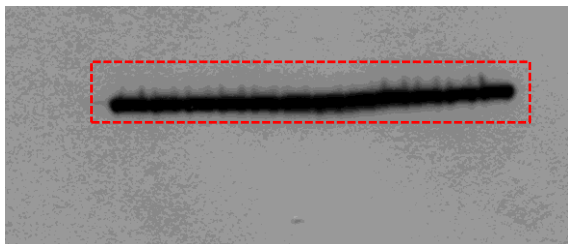

IP: Flag  
IB: Wip1

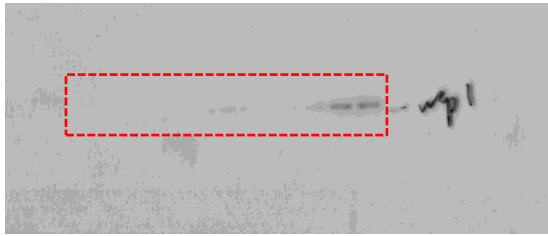

IP: Flag  
IB: Flag

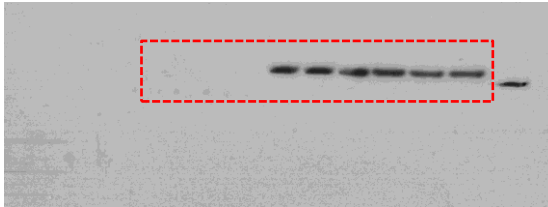

INPUT  
IB: Flag

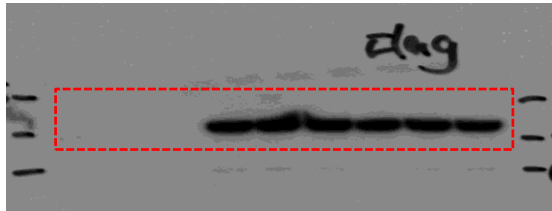

INPUT  
IB: Wip1

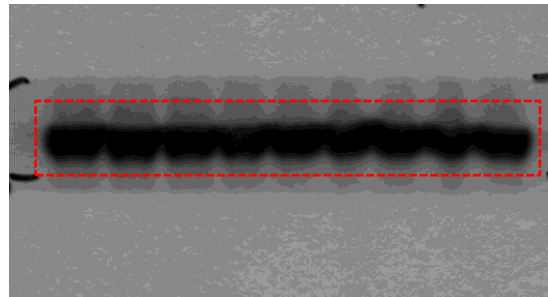

INPUT  
IB: Actin

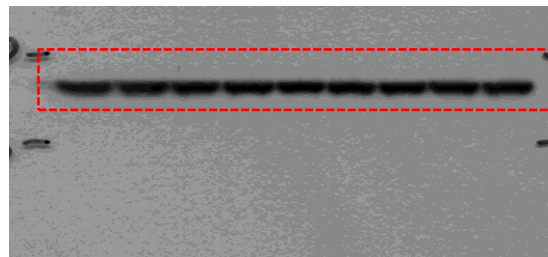

Supplement: 41556_2024_1428_MOESM10_ESM.pdf [file 41556_2024_1428_MOESM10_ESM.pdf]
