# Supplementary material for: RETRACTED ARTICLE: Tumour microenvironment programming by an RNA–RNA-binding protein complex creates a druggable vulnerability in IDH-wild-type glioblastoma
Source: Springer Nature journal article supplement (doi:10.1038/s41556-024-01428-5), 2024-06-01

IDH1  
(R132H)

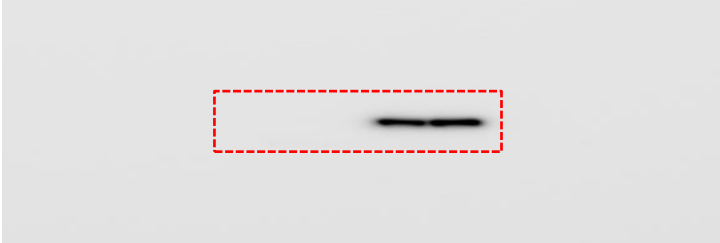

Actin

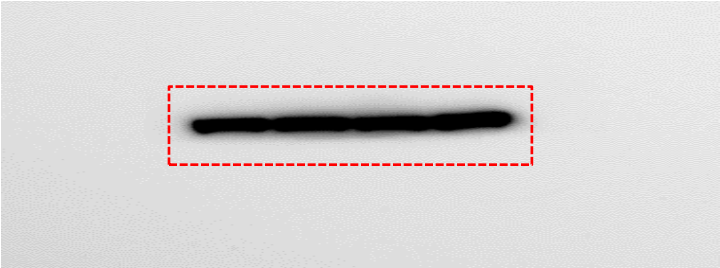

Supplement: 41556_2024_1428_MOESM7_ESM.pdf [file 41556_2024_1428_MOESM7_ESM.pdf]
