# Supplementary material for: RETRACTED ARTICLE: Tumour microenvironment programming by an RNA–RNA-binding protein complex creates a druggable vulnerability in IDH-wild-type glioblastoma
Source: Springer Nature journal article supplement (doi:10.1038/s41556-024-01428-5), 2024-06-01

IP: GFP  
IB: Wip1

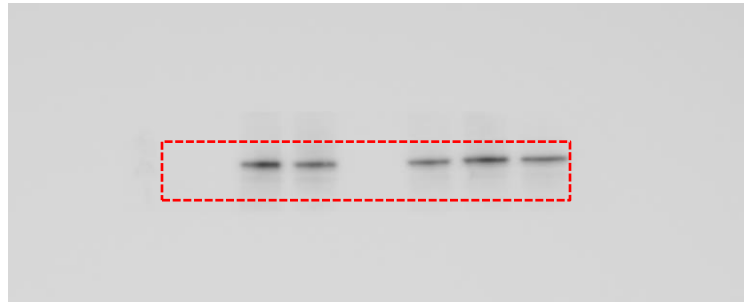

IP: GFP  
IB: GFP

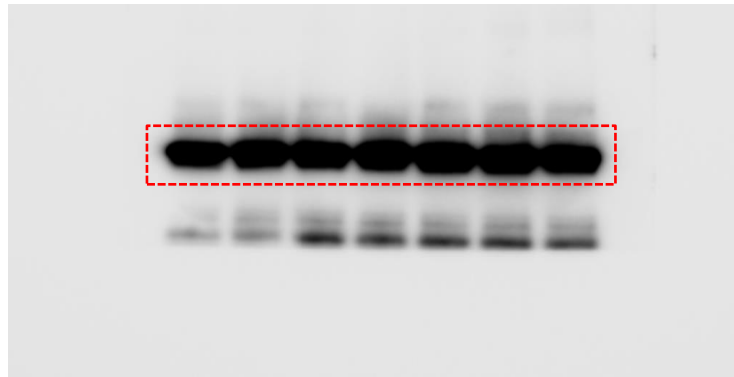

INPUT  
DHX15

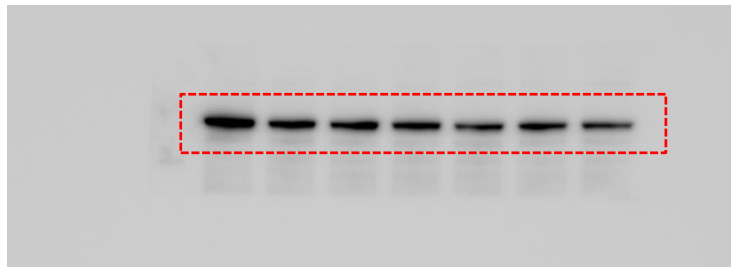

INPUT  
GFP

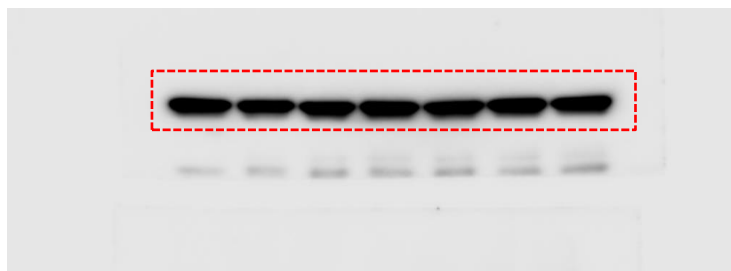

INPUT  
GAPDH

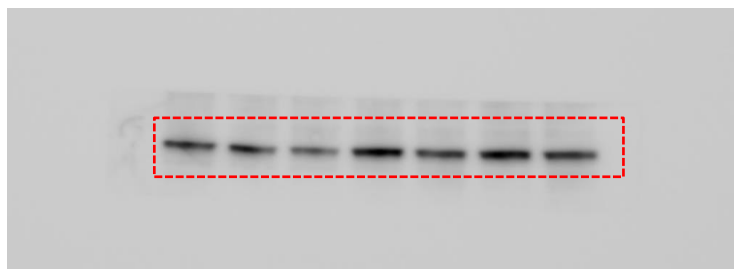

Supplement: 41556_2024_1428_MOESM19_ESM.pdf [file 41556_2024_1428_MOESM19_ESM.pdf]
